# Supplementary material for: Porous metal–organic molecular cage: a promising candidate to highly improve the nanofiltration performance of thin film nanocomposite membranes
Source: Royal Society of Chemistry journal article supplement (doi:10.1039/c8nj04603d), 2018-12-11
Supplement: c8nj04603d1.pdf [file c8nj04603d1.pdf]

## Supporting Information

### **Porous metal-organic molecular cage: A promising candidate to highly improve the nanofiltration performance of thin film nanocomposite membrane**

*Chunfang Zhang, Xuejian Si, Shuo Zhang, Bei Pei, Jin Gu, Yunxiang Bai\**

Key Laboratory of Synthetic and Biological Colloids, Ministry of Education, School of Chemical  
and Material Engineering, Jiangnan University, Wuxi 214122, PR China

---

Correspondence to: Y. X. Bai (E-mail: [baisir223@163.com](mailto:baisir223@163.com); Tel: +86 51085917090; fax: +86  
51085917763)

### 1. XRD patterns of membranes

XRD patterns of PA TFC and PA/*Fe*-cage TFN membranes were obtained from a X-ray D8 Advance instrument with Cu K $\alpha$  radiation in the  $2\theta$  range from  $5^\circ$  to  $70^\circ$  at a rate of  $2^\circ/\text{min}$  (40 kV, 20 mA,  $\lambda = 0.15406 \text{ nm}$  ).

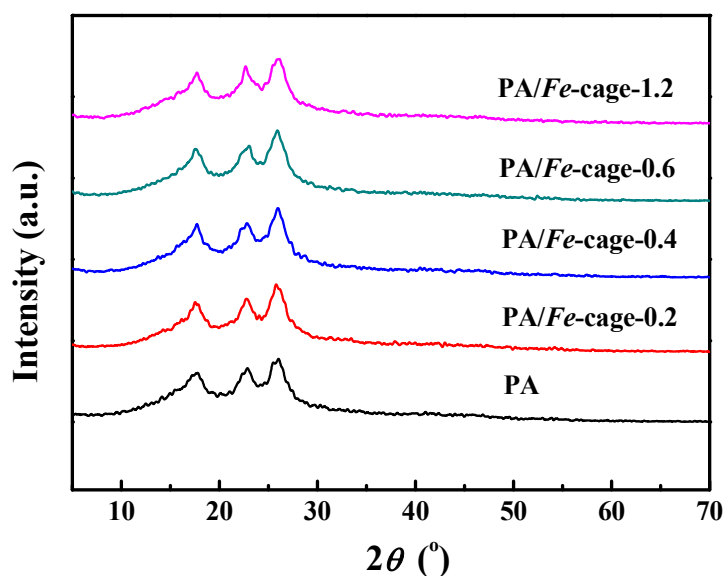

**Figure S1.** XRD patterns of PA TFC and PA/*Fe*-cage TFN membranes.

### 2. Chlorine resistant capability of the membranes

The chlorine resistant capability of the membranes was determined by employing the NaClO solution containing different concentration of active chlorine. The membranes were immersed into NaClO solution for 1 h, and then taken out. After being washed by DI water, the membranes were measured in terms of the water flux and Na<sub>2</sub>SO<sub>4</sub> rejection using a 1 g/L Na<sub>2</sub>SO<sub>4</sub> feed solution at 0.5 MPa.

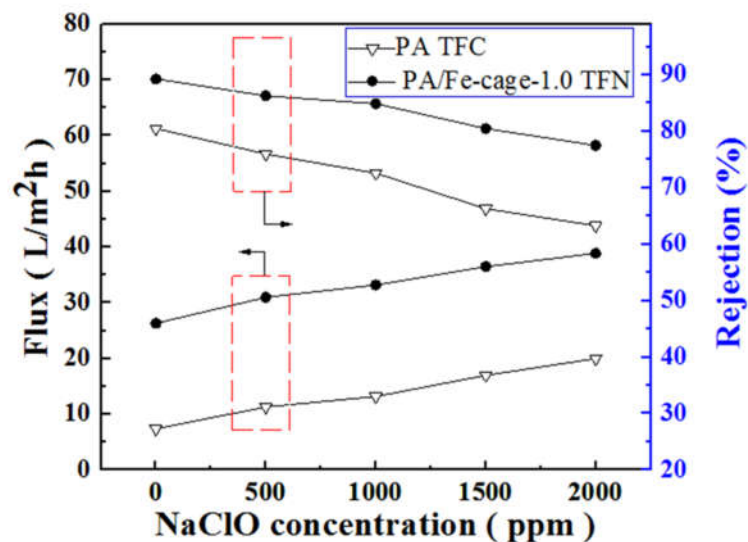

**Figure S2.** Water flux and  $\text{Na}_2\text{SO}_4$  rejection behaviors of the PA TFC membrane and the PA/Fe-cage-1.0 TFN membrane with different chlorine exposure treatment.

### 3. EDX

**Table S1.** Element content of PA/Fe-cage-1.0 TFN membranes surface detected by EDX analysis.

| Filtration time | Element Content (wt%) |       |      |      |      |
|-----------------|-----------------------|-------|------|------|------|
|                 | C                     | N     | O    | S    | Fe   |
| 0               | 62.67                 | 27.41 | 9.12 | 0.39 | 0.41 |
| 1 day           | 68.65                 | 22.48 | 8.14 | 0.34 | 0.39 |
| 5 days          | 68.62                 | 22.43 | 8.14 | 0.33 | 0.38 |
| 20 days         | 67.93                 | 22.48 | 8.15 | 0.35 | 0.39 |
